# Supplementary material for: Downregulation of microRNA-23a suppresses prostate cancer metastasis by targeting the PAK6-LIMK1 signaling pathway
Source: PubMed Central journal article supplement (PMC4414162; doi:10.18632/oncotarget.2880), 2015-01-16
Supplement: oncotarget-06-3904-s001.pdf [file oncotarget-06-3904-s001.pdf]

## SUPPLEMENTARY TABLE AND FIGURE

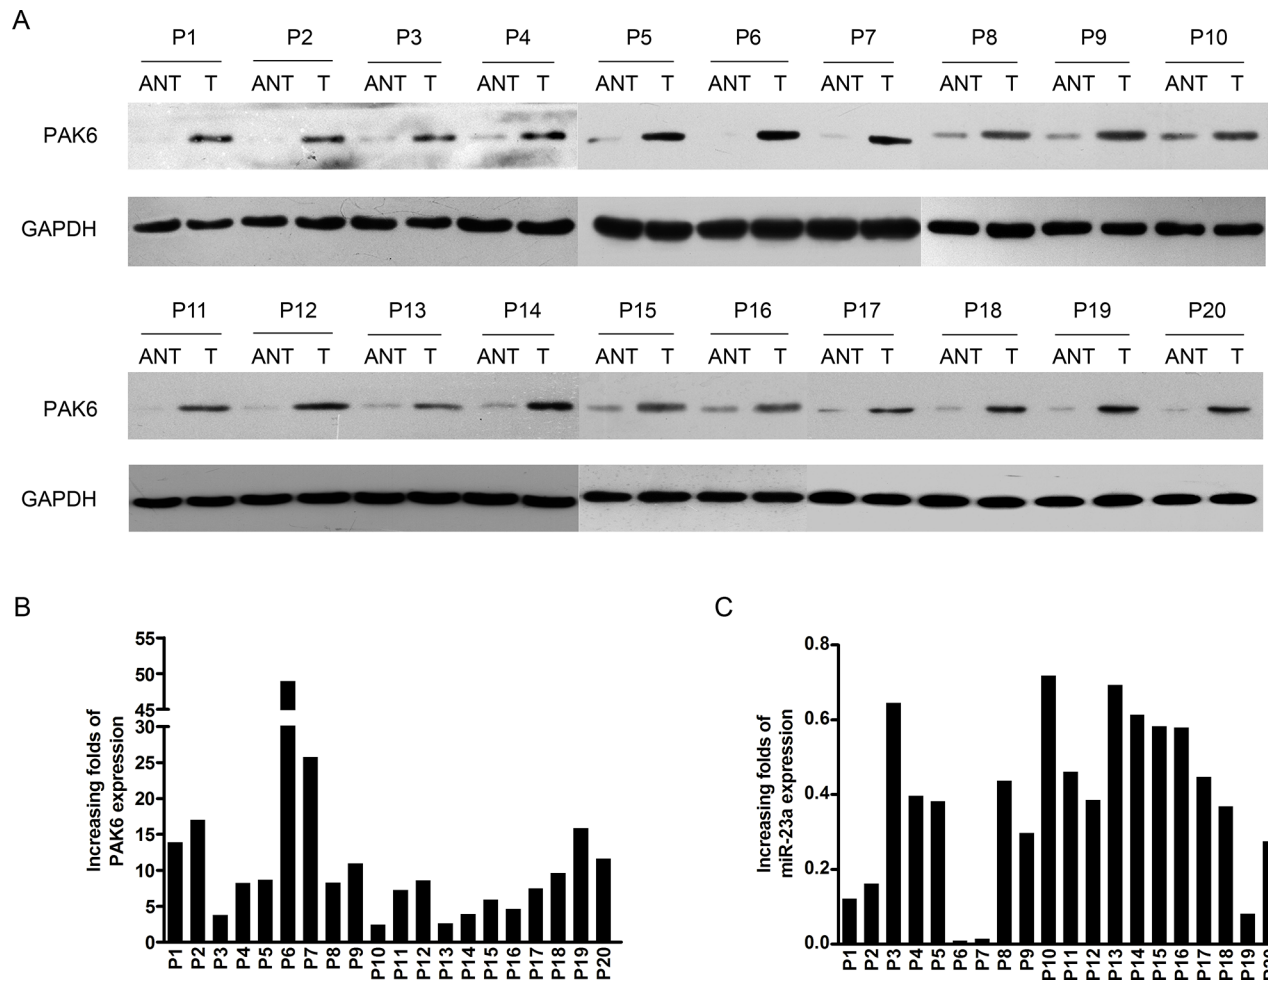

**Supplementary Figure 1: Clinical relationship between miR-23a and PAK6 expression in human prostate cancer tissues.** (A) Western blotting for PAK6 protein expression in aforementioned 20 pairs of surgically resected fresh prostate cancer tissues. GAPDH was used as loading control. (B) PAK6 protein expression was quantified by scanning densitometry and scored. Fold increase in PAK6 expression in prostate cancer tissues compared with matched adjacent non-cancerous tissues was calculated for each patient. (C) Fold increase in miR-23a expression in prostate cancer tissue compared with matched adjacent non-cancerous tissues was calculated for each patient.

**Supplementary Table 1: 51 microRNAs were identified as altered markedly in three pairs of primary prostate cancer and matched adjacent non-tumor tissues by examining the expression profiling of human miRNAs**

| miRNA ID   | <i>P</i> Value | Fold Up- or Down-Regulation | miRNA ID   | <i>P</i> Value | Fold Up- or Down-Regulation |
|------------|----------------|-----------------------------|------------|----------------|-----------------------------|
| miR-328    | 0.0312         | -7.21                       | miR-432    | 0.0029         | -4.58                       |
| miR-143    | 0.0433         | -27.52                      | miR-337-3p | 0.0353         | -7.24                       |
| miR-218    | 0.0490         | -9.97                       | miR-144    | 0.0398         | 5.99                        |
| miR-140-5p | 0.0394         | -3.65                       | miR-184    | 0.0148         | -27.42                      |
| miR-30c    | 0.0419         | -5.46                       | let-7c     | 0.0084         | -7.22                       |
| miR-487b   | 0.0402         | -8.26                       | miR-488    | 0.0032         | -200.36                     |
| miR-130a   | 0.0269         | -9.04                       | miR-455-5p | 0.0199         | -5.91                       |
| miR-26a-2* | 0.0200         | -8.27                       | miR-30e*   | 0.0166         | -5.83                       |
| miR-221    | 0.0156         | -17.65                      | miR-181c   | 0.0111         | -7.58                       |
| miR-424    | 0.0031         | -4.81                       | miR-499-5p | 0.0378         | -17.95                      |
| miR-532-5p | 0.0218         | -3.11                       | miR-152    | 0.0144         | -12.05                      |
| miR-99a    | 0.0121         | -5.55                       | miR-29c    | 0.0155         | -9.90                       |
| miR-125b   | 0.0215         | -7.77                       | miR-133a   | 0.0275         | -41.76                      |
| miR-574-3p | 0.0446         | -4.90                       | miR-299-5p | 0.0260         | -6.43                       |
| let-7e     | 0.0297         | -5.75                       | miR-145    | 0.0373         | -26.33                      |
| miR-133b   | 0.0494         | -32.50                      | miR-29a    | 0.0270         | -9.00                       |
| miR-204    | 0.0406         | -69.06                      | miR-222    | 0.0174         | -15.01                      |
| miR-374b   | 0.0299         | -4.12                       | miR-181b   | 0.0290         | -4.55                       |
| miR-26a    | 0.0225         | -12.07                      | miR-1      | 0.0271         | -36.74                      |
| miR-99b    | 0.0237         | -5.52                       | miR-338-3p | 0.0459         | -5.26                       |
| miR-23a    | 0.0428         | -13.81                      | miR-216a   | 0.0461         | 92.97                       |
| miR-505    | 0.0321         | -3.79                       | miR-450a   | 0.0188         | -5.49                       |
| miR-887    | 0.0494         | -4.87                       | miR-365    | 0.0426         | -5.70                       |
| miR-873    | 0.0040         | -125.68                     | miR-100    | 0.0252         | -11.85                      |
| miR-181d   | 0.0402         | -7.61                       | miR-27b    | 0.0118         | -9.32                       |
| miR-342-3p | 0.0257         | -4.03                       |            |                |                             |
